# Supplementary material for: Maternal antenatal anxiety and electrophysiological functioning amongst a sub-set of preschoolers participating in the GUSTO cohort
Source: PubMed Central journal article supplement (PMC7017524; doi:10.1186/s12888-020-2454-3), 2020-02-12
Supplement: 12888_2020_2454_MOESM1_ESM.pdf [file 12888_2020_2454_MOESM1_ESM.pdf]

**Supplementary Table 1. List of Included Electrodes by Hemisphere and Region**

---

**Frontal Midline Channels (n = 3)**

Frontal Midline Channel 15

Frontal Midline Channel 16

Frontal Midline Channel 11

**Central Midline Channels (n = 1)**

Central Midline Channel 6

**Frontal Left Channels (n = 10)**

Frontal Left Channel 26

Frontal Left Channel 23

Frontal Left Channel 19

Frontal Left Channel 12

Frontal Left Channel 33

Frontal Left Channel 27

Frontal Left Channel 24

Frontal Left Channel 20

Frontal Left Channel 34

Frontal Left Channel 28

**Frontal Right Channels (n = 10)**

Frontal Right Channel 2

Frontal Right Channel 3

Frontal Right Channel 4

Frontal Right Channel 5

Frontal Right Channel 122

Frontal Right Channel 123

Frontal Right Channel 124

Frontal Right Channel 118

Frontal Right Channel 116

Frontal Right Channel 117

**Central Left Channels (n = 10)**

Central Left Channel 7

Central Left Channel 13

Central Left Channel 29

Central Left Channel 35

Central Left Channel 41

Central Left Channel 36

Central Left Channel 30

Central Left Channel 42

Central Left Channel 37

Central Left Channel 31

**Central Right Channels (n = 10)**

Central Right Channel 112

Central Right Channel 106

Central Right Channel 80

Central Right Channel 105

Central Right Channel 111

Central Right Channel 110

Central Right Channel 104

Central Right Channel 87

Central Right Channel 103

Central Right Channel 93

**Supplementary Table 2. Relations between Covariates, Antenatal Maternal Mental Health, and Preschool Electrophysiology**

|                      | <b>Maternal Age</b> | <b>Child Age in Days</b> | <b>Household Income</b> | <b>Maternal Highest Education</b> | <b>Ethnicity</b> |
|----------------------|---------------------|--------------------------|-------------------------|-----------------------------------|------------------|
| N1 Pre               | 0.11                | 0.05                     | -0.07                   | -0.01                             | 1.55             |
| N1 Post              | -0.05               | -0.06                    | -0.19                   | -0.16                             | 3.86*            |
| P2_N1 Pre            | -0.03               | 0.03                     | -0.01                   | -0.02                             | 1.77             |
| P2_N1 Post           | 0.03                | 0.02                     | 0.16                    | 0.13                              | 2.384†           |
| N2_P2 Pre            | -0.02               | 0.12                     | -0.10                   | -0.03                             | 1.12             |
| N2_P2 Post           | -0.06               | 0.17                     | -0.15                   | -0.09                             | 0.970            |
| Antenatal Anxiety    | -0.05               | -0.03                    | -0.08                   | -0.21†                            | 2.73†            |
| Antenatal depression | -0.20†              | 0.06                     | -0.01                   | -0.18                             | 0.08             |

\*\*\*p≤ .001, \*\*p≤ .01, \*p≤ .05, p≤ .10

Relations examining continuous screened covariates (i.e., maternal age, child age, household income, and maternal education) were performed with Pearson correlations, and the above values reflect Pearson R's. Associations between ethnicity and the maternal mental health/electrophysiological components were assessed via ANOVA, with the above values reflecting the F statistic. N's are as follows: ERP components and maternal age/child age/maternal education, N = 71; ERP components and ethnicity, N = 70; ERP components and household income, N = 66.; antenatal anxiety and maternal age/child age, N = 68; antenatal anxiety and household income, N = 64; antenatal anxiety and maternal education/ethnicity, N = 67; antenatal depression and maternal age/child age, N = 69; antenatal depression and child age, N = 69; antenatal depression and maternal education/ethnicity, N = 68; antenatal depression and household income, n = 66.

---

**Supplementary Table 3. Task Behavioral Performance**

---

**Descriptives of Pre and Post Block Behavioral Performance**

|                                                | n  | Preswitch Block |        | Postswitch Block |        |
|------------------------------------------------|----|-----------------|--------|------------------|--------|
|                                                |    | Mean            | SD     | Mean             | SD     |
| Accuracy (%) All ERP Cases                     | 71 | 0.87            | 0.11   | 0.87             | 0.13   |
| Correct Reaction Time All ERP Cases            | 71 | 1786.49         | 722.35 | 1957.15          | 510.15 |
| Accuracy (%) Antenatal Anxiety Sample          | 68 | 0.87            | .11    | 0.86             | 0.13   |
| Correct Reaction Time Antenatal Anxiety Sample | 68 | 1810.74         | 728.17 | 1969.39          | 517.23 |

**Comparison of Pre and Post Accounting for Anxiety, Gender, & Pres-switch pass versus fail status**

|                                              | F    | Df   | <i>p</i> |
|----------------------------------------------|------|------|----------|
| Accuracy                                     |      |      |          |
| Pre versus Post Accuracy                     | .976 | 1,64 | .327     |
| Antenatal Anxiety X Pre versus Post Accuracy | .573 | 1,64 | .452     |
| Gender X Pre versus Post Accuracy            | .284 | 1,64 | .596     |

Pre-switch pass/fail status X Pre versus Post 2.322 1,64 .132

Accuracy

**Reaction Time**

Pre versus Post Correct Reaction Time .205 1,64 .653

Antenatal Anxiety X Pre versus Post .022 1,64 .882

Correct Reaction Time

Gender X Pre versus Post Correct Reaction .563 1,64 .456

Time

Pre-switch pass/fail status X versus Post 1.463 1,64 .231

Correct Reaction Time



**Supplementary Table 4. Correlations between Maternal Mental Health and ERP Variables**

|                                     | N1 PRE | P2_N1 PRE | N2_P2 PRE | N1 POST | P2_N1 POST | N2_P2 POST |
|-------------------------------------|--------|-----------|-----------|---------|------------|------------|
| Antenatal<br>Anxiety (n =<br>68)    | -0.01  | -0.06     | 0.16      | .309**  | -.271*     | .257*      |
| Antenatal<br>Depression (n =<br>69) | -0.07  | -0.11     | 0.21†     | .290*   | -.238*     | .259*      |
| Postnatal<br>Anxiety (n =<br>61)    | -0.24† | 0.12      | -0.02     | 0.02    | -0.01      | 0.05       |
| Postnatal<br>Depression (n =<br>61) | -0.18  | 0.01      | 0.06      | 0.07    | -0.01      | 0.02       |

\* $p \leq 0.05$ , \*\* $p \leq 0.01$ , \*\*\* $p \leq 0.00$

**Supplementary Figure 1. Topography in the 71 ERP+ sample**

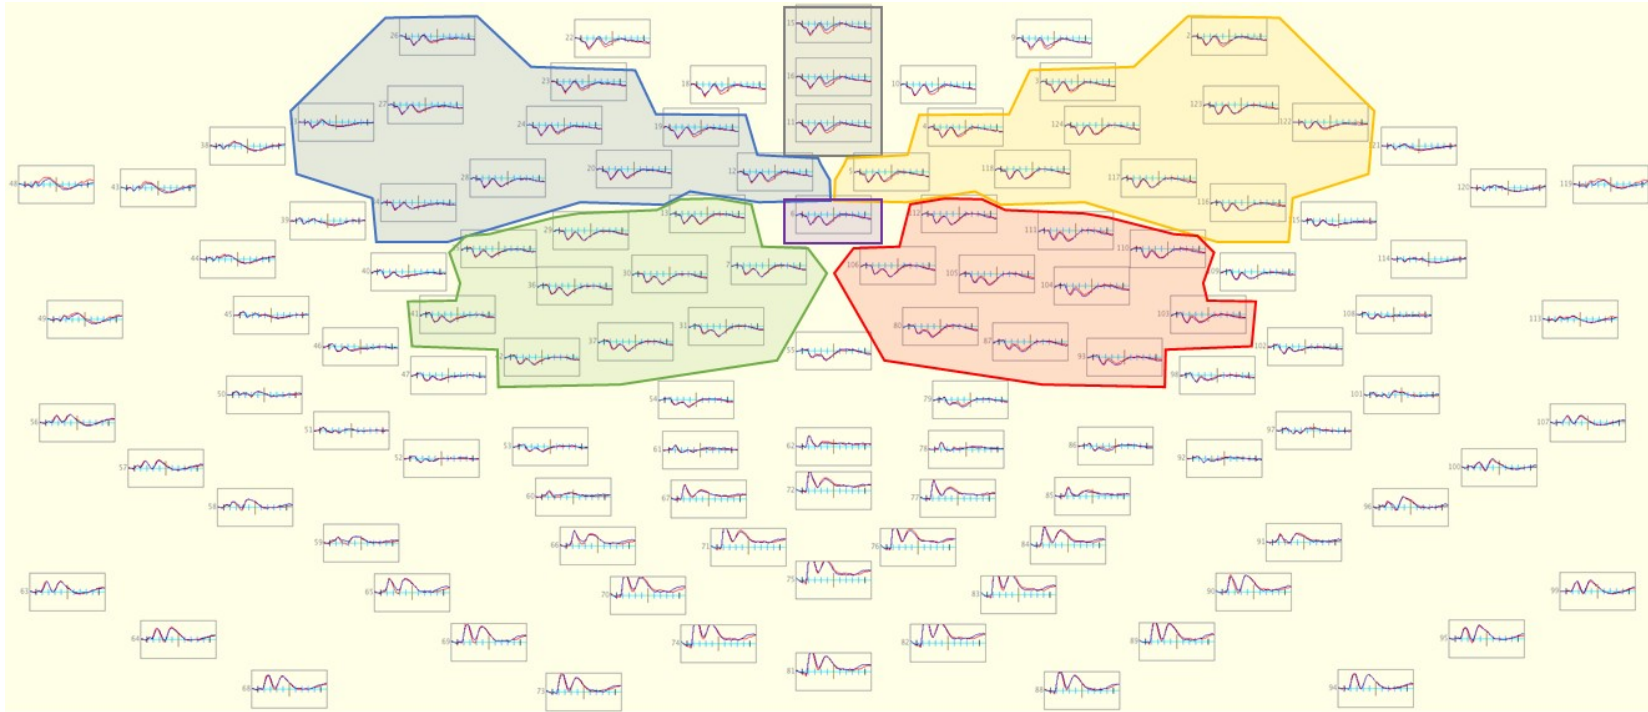

Included channels are outlined in blue (Frontal Left), yellow (Frontal Right), green (Central Left), red (Central Right), and by the boxed regions (Midline Frontal and Midline Central).
